# Supplementary material for: Transversus Abdominis Plane with Rectus Sheath Blocks versus Port Site Infiltration of Local Anaesthesia in Emergency Laparoscopic Cholecystectomy. Does It Reduce Postoperative Opiate Requirement? A Pilot Study
Source: Preprints.org preprint supplement (doi:10.20944/preprints202406.1080.v1), 2024-06-17
Supplement: Supplementary file 1 [file supplementary]

**Title**

Transversus abdominis plane with rectus sheath blocks versus port site infiltration of local anaesthesia in emergency laparoscopic cholecystectomy. Does it reduce postoperative pain and opiate requirement? A pilot study.

**Short Title**

TAP and RS blocks versus local anaesthetic to port sites in laparoscopic cholecystectomy. Does it reduce postoperative pain? A pilot study.

**Authors**

Sara Izwan, BSc, MHumBiol, MD1,2

Tanishk Malhotra, BMedSt, MD1,3

Ujvala Vemuru, BMedSt, MD1,3

Michelle Cooper, MBBS(Hons), FRACS1

**Affiliations**

1. Department of General Surgery, Gold Coast University Hospital, Southport, Queensland 4215
2. School of Medicine and Dentistry, Griffith University, Southport, Queensland 4215
3. Faculty of Health Sciences and Medicine, Bond University, Robina, Queensland 4226

**Corresponding Author**

Dr Michelle Cooper

Department of General Surgery, Gold Coast University Hospital

1 Hospital Boulevard, Southport, QLD 4215

Phone: (07) 5687 0000

Email: [Michelle.Cooper2@health.qld.gov.au](mailto:Michelle.Cooper2@health.qld.gov.au)

**Figures and Tables**

Figures: 4

Tables: 2

**Word Count**

Abstract: 198

Main text: 3,590 including references, excluding figures and tables

**Keywords**: laparoscopic cholecystectomy, regional anaesthesia, general surgery
